# Supplementary material for: Selenylation Modification of Atractylodes macrocephala Polysaccharide and Evaluation of Antioxidant Activity
Source: Hindawi journal article supplement (doi:10.1155/2019/8191385), 2019-04-01
Supplement: f1 [file 8191385.f1.pdf]

Table 1 The modification conditions, yields, contents of carbohydrate and selenium of nine sAMPs (N=4)

| sAMPs             | A<br>Na <sub>2</sub> SeO <sub>3</sub> /mg | B<br>Time/h | C<br>Temperature/°C | Rate of<br>Yeild (%) | Carbohydrate<br>content (%) | Se content<br>(mg g <sup>-1</sup> ) |
|-------------------|-------------------------------------------|-------------|---------------------|----------------------|-----------------------------|-------------------------------------|
| sAMP <sub>1</sub> | 200                                       | 6           | 50                  | 19.50                | 36.10                       | 6.12                                |
| sAMP <sub>2</sub> | 300                                       | 8           | 50                  | 24.58                | 46.34                       | 8.72                                |
| sAMP <sub>3</sub> | 400                                       | 10          | 50                  | 22.42                | 48.00                       | 10.76                               |
| sAMP <sub>4</sub> | 200                                       | 6           | 70                  | 26.80                | 62.99                       | 12.23                               |
| sAMP <sub>5</sub> | 300                                       | 8           | 70                  | 31.70                | 41.70                       | 9.67                                |
| sAMP <sub>6</sub> | 400                                       | 10          | 70                  | 25.18                | 44.21                       | 10.45                               |
| sAMP <sub>7</sub> | 200                                       | 6           | 90                  | 26.82                | 42.94                       | 8.98                                |
| sAMP <sub>8</sub> | 300                                       | 8           | 90                  | 19.76                | 46.33                       | 9.33                                |
| sAMP <sub>9</sub> | 400                                       | 10          | 90                  | 22.6                 | 50.61                       | 11.27                               |
